# Supplementary material for: Heterogeneous Solid-State Plasticity of a Multi-Functional Metallo-Supramolecular Shape-Memory Polymer towards Arbitrary Shape Programming
Source: Polymers (Basel). 2022 Apr 14;14(8):1598. doi: 10.3390/polym14081598 (PMC9027464; doi:10.3390/polym14081598)
Supplement: Supplementary file 1 [file polymers-14-01598-s001.zip › polymers-1664731-supplementary.pdf]

## Supporting Information

Heterogeneous solid-state plasticity of a multi-functional metallo-supramolecular shape-memory polymer towards arbitrarily shape programming

Guancong Chen<sup>1,2</sup>, Di Chen<sup>1,2,\*</sup>

<sup>1</sup> Ningbo Research Institute of Zhejiang University, Ningbo 315100, China; 11928058@zju.edu.cn (G. Chen)

<sup>2</sup> State Key Laboratory of Chemical Engineering, College of Chemical and Biological Engineering, Zhejiang University, Hangzhou 310027, China.

\* Correspondence: di\_chen@zju.edu.cn

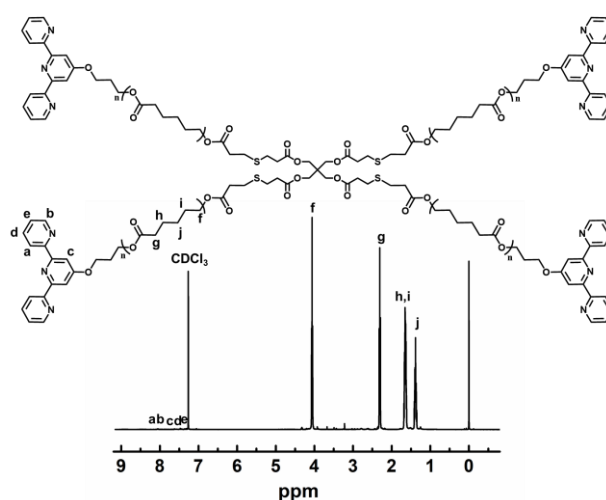

**Figure S1.** The <sup>1</sup>H-NMR spectrum of the four-armed macro-monomer.

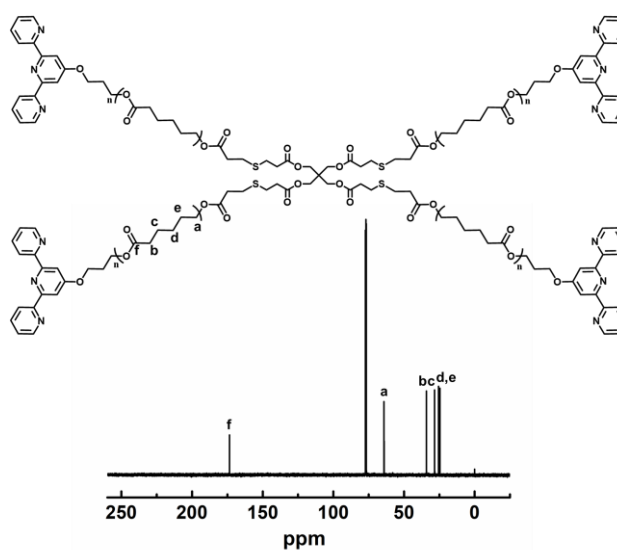

**Figure S2.** The <sup>13</sup>C-NMR spectrum of the four-armed macro-monomer.

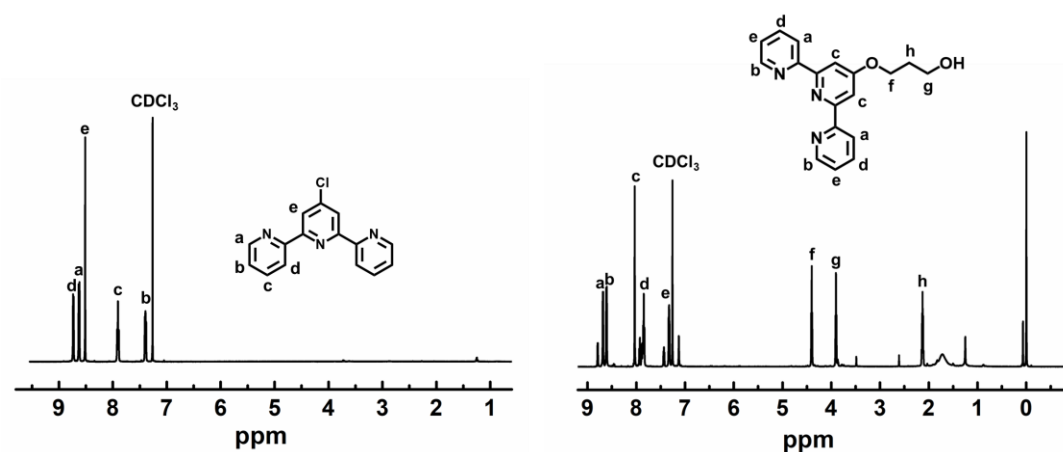

**Figure S3.** The  $^1\text{H}$ -NMR spectrum of the Chloro-2,2':6',2''-Tripyridine (left) and hydroxyl terminated TPY (right).

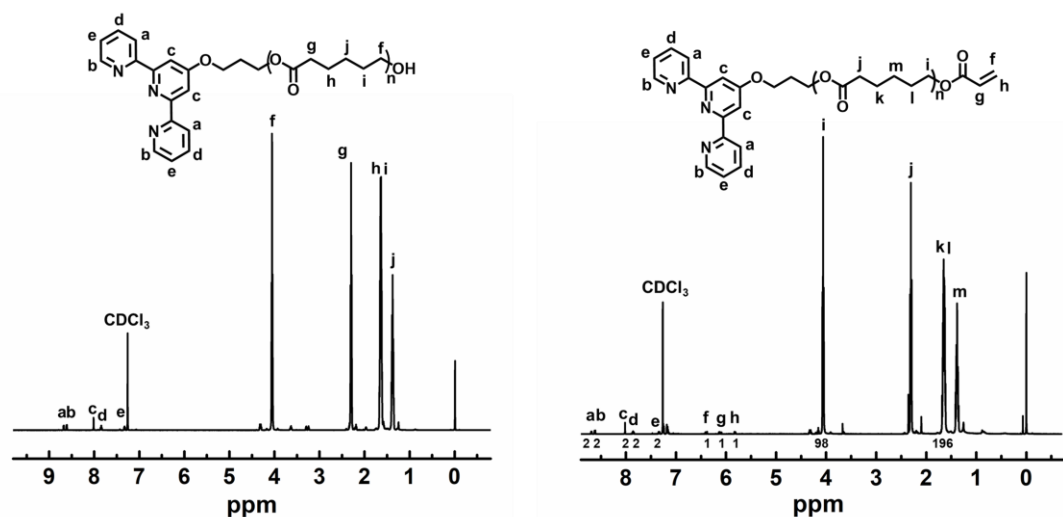

**Figure S4.** The  $^1\text{H}$ -NMR spectrum of the polycaprolactone with a terpyridine end group (left) and TPYA (right).
